# Supplementary material
Source: PubMed Central journal article supplement (PMC2941511)
Supplement: NIHMS233476-supplement-Choi_Supp_Data.pdf [file NIHMS233476-supplement-Choi_Supp_Data.pdf]

**Supplementary Table S1.** PCR amplification and sequencing primers for noncoding conserved sequences

| Region | Genomic location (nt)** | Primer sequence                                                                                                          | Novel nucleotide variation*                                                                                                                                                                                     |
|--------|-------------------------|--------------------------------------------------------------------------------------------------------------------------|-----------------------------------------------------------------------------------------------------------------------------------------------------------------------------------------------------------------|
| a      | 107,071,320-107,071,430 | F-CTTCCTAAATTCCTTAGGGAGTGAC<br>R-GTTTCTTGAGGGCTAATCCTTATCT                                                               |                                                                                                                                                                                                                 |
| b      | 107,072,250-107,072,850 | F-CATAATTAAGATGCTGCACTCTGTG<br>R-CTAAAGGTTGTTATTTGGGAGAAT<br>F-ATTATAATTTCTTTGGGTGGGAGAA<br>R-ATTTAAGCTTCCCTTGACTCAATTT  |                                                                                                                                                                                                                 |
| c      | 107,073,820-107,073,970 | F-AGACCTATTAGGACGCTATTGCTTT<br>R-ATTGTGCACATGTACCCTAAAACCTT                                                              |                                                                                                                                                                                                                 |
| d      | 107,080,160-107,080,210 | F-GTACCTCAGTTGGAAATGCAGAAAT<br>R-GATCACACCACTGCACTCTAGC                                                                  |                                                                                                                                                                                                                 |
| e      | 107,081,605-107,081,635 | F-AGCCTGGAACAATTTGATTTCTTA<br>R-CAATCTTCGGAAGGAAGTCACTAT                                                                 |                                                                                                                                                                                                                 |
| f      | 107,082,670-107,082,730 | F-TTCCCCTTTACAAGTGTCATTA<br>R-TCCTCAGTATATATGTGGCAACTGA                                                                  |                                                                                                                                                                                                                 |
| g      | 107,084,175-107,084,290 | F-AAAAACAAACAAACAAACACACAC<br>R-AGAGAATCCAACCATTA<br>R-AGAGAATCCAACCATTA<br>R-AGAGAATCCAACCATTA                          |                                                                                                                                                                                                                 |
| h      | 107,085,630-107,086,150 | F-ATAAATATGAGGCCAGGGTATAAGC<br>R-ACCTTAGATTACTCACTTGGGCTTT<br>F-AAGTGATGCATCTATTTCTTTGGAA<br>R-AATAAGTCTGTCATGTATCTGGATG | Heterozygous g.-3521A>T in <i>cis</i> with p.M1T in family 242, 4/110 normal control chromosomes<br>Heterozygous g.-3247T>C in <i>cis</i> with p.L445W in families 142 and 264, 5/78 normal control chromosomes |
| i      | 107,086,415-107,086,435 | F-GTTACTCTTTTGCCTCCTGTTGTTA<br>R-ACAACTCTTTATTGAAGGCATTCTG                                                               |                                                                                                                                                                                                                 |
| j      | 107,086,835-107,087,000 | F-TTTTGTCTAGTGAGGGAGAGAGAA<br>R-CAACTCCACTACAACAGAGGAAAGT                                                                | Heterozygous g.-2393A>C in <i>cis</i> with p.M1T in family 242, 5/104 normal control chromosomes                                                                                                                |
| k      | 107,087,263-107,087,371 | F-TCATTGTAGGATGTTTAGCAGCAT<br>R-TCTCTGAAATGGTAGTCAGCATGT                                                                 | Heterozygous g.-1952_-1951insT in <i>cis</i> with p.M1T in family 242, 5/110 normal control chromosomes                                                                                                         |
| l      | 107,087,470-107,087,600 | F-CTCCCCTCTTCTCTGTATGTGAATA<br>R-CTCTGTACATCAACCTTCCGTAATC                                                               |                                                                                                                                                                                                                 |
| m, n   | 107,087,850-107,088,100 | F-AGTTTTAACAAAGTTCATCCCAACA<br>R-GGGACTCCTTAAAGAAGAGCAGAG                                                                |                                                                                                                                                                                                                 |
| o      | 107,089,050-107,089,200 | F-GTTTGGGGGAGATTCAGAAC<br>R-GAAGAGCGAGGAACAGAAAGAAC                                                                      |                                                                                                                                                                                                                 |
| p      | 107,090,500-107,090,850 | F-TTTTTCTTTCATCTGTAGGTCCTG<br>R-ACAAAGTTATGAACTGGATTCTGCT                                                                |                                                                                                                                                                                                                 |
| q      | 107,100,300-107,100,700 | F-GTGATCAATTTGACTCCATTTTTG<br>R-TTCTTTCAATCAAAACCTCTTTCTG<br>F-CAAGGTCTTTGAACCTACCATTTA<br>R-TATTTCAAGAGGATCATCGAGGTAG   |                                                                                                                                                                                                                 |
| r      | 107,103,950-107,104,350 | F-ATGCCTCATTGGATTGTTAAATAAG<br>R-TATGTGTACATGGCCTTACATTGTT<br>F-TATTGGTGAAATGAAATGATTGGAG<br>R-TGTTGACACGTTATTTTTGTATGGT |                                                                                                                                                                                                                 |
| s      | 107,119,750-107,120,000 | F-ATGTCCATTCTCCTGATGTTACCT<br>R-AAGTTCCAACATAAGAGAAAACACG                                                                |                                                                                                                                                                                                                 |
| t      | 107,121-180-107,121,400 | F-ACTCAGACCTTTTGCCTAGACAGT<br>R-CAGCCTGAAACAGTACTATGG                                                                    |                                                                                                                                                                                                                 |
| u      | 107,125,530-107,125,600 | F-CGTGAAAGCTCTATGCTTATCCTAT<br>R-AACAGCCGATTTTGGAAATAAAAAG                                                               |                                                                                                                                                                                                                 |
| v      | 107,148,570-107,148,880 | F- CCTGGAAGTATTTGGTTGAGTAAGA<br>R- GGCTATGAAAATAAAAATCACATCC                                                             |                                                                                                                                                                                                                 |

\*Polymorphisms from dbSNP are not included. \*\*Nucleotide numbering was based upon the UCSC version hg18 (March 2006).

**Supplementary Table S2. M0 twins.**

|                                         |                                                |                                              |                                              |                                                |                                               |
|-----------------------------------------|------------------------------------------------|----------------------------------------------|----------------------------------------------|------------------------------------------------|-----------------------------------------------|
| Family #                                | 213                                            | 219 <sup>a</sup>                             | 240                                          | 245                                            | 261                                           |
| Zygoty <sup>b</sup>                     | MZ                                             | DZ                                           | DZ                                           | MZ                                             | DZ                                            |
| Family history of twinning <sup>b</sup> | Maternal-DZ                                    | Maternal-DZ                                  | No                                           | Maternal-DZ                                    | Maternal-MZ                                   |
| Assisted reproductive technology        | None                                           | None                                         | Clomiphene citrate                           | None                                           | <i>In vitro</i> fertilization                 |
| Paternal age (years) at conception      | 30                                             | 26                                           | 37                                           | 35                                             | 41                                            |
| Gestational age (weeks) at birth        | 36                                             | 38                                           | 37                                           | 37                                             | 38                                            |
| Birthweight <sup>c</sup> (lbs)          | 1: 5 <sup>14/16</sup><br>2: 5 <sup>10/16</sup> | 1: 6 <sup>9/16</sup><br>2: 5 <sup>7/16</sup> | 1: 6 <sup>1/16</sup><br>2: 5 <sup>6/16</sup> | 1: 4 <sup>15/16</sup><br>2: 4 <sup>13/16</sup> | 1: 6 <sup>8/16</sup><br>2: 5 <sup>11/16</sup> |
| Gender <sup>c</sup>                     | 1: female<br>2: female                         | 1: female<br>2: female                       | 1: male<br>2: female                         | 1: female<br>2: female                         | 1: male<br>2: female                          |
| EVA laterality <sup>c</sup>             | 1: none<br>2: left                             | 1: bilateral<br>2: right                     | 1: none<br>2: bilateral                      | 1: left<br>2: left                             | 1: bilateral<br>2: none                       |
| Other health issues <sup>c</sup>        | 1: none<br>2: asthma                           | 1: asthma,<br>eczema<br>2: none              | 1: none<br>2: none                           | 1: none<br>2: exercise-<br>induced asthma      | 1: seasonal<br>asthma<br>2: none              |

<sup>a</sup>Mother took Tegretol during pregnancy

<sup>b</sup>MZ, monozygotic; DZ, dizygotic

<sup>c</sup>1, older twin; 2, younger twin
